# Supplementary material
Source: publisher site journal article supplement (https://www.degruyter.com/publication/journal_key/GPS/downloadAsset/GPS_GPS_Special_Issue_Biomass_Pretreatment_CfP.pdf)
Supplement: Supplementary file 1 [file GPS_GPS_Special_Issue_Biomass_Pretreatment_CfP.pdf]

## Special Issue in Green Processing and Synthesis: ADVANCEMENT IN THE INTENSIFICATION OF LIGNOCELLULOSIC BIOMASS PRETREATMENT

### GUEST EDITORS

---

**Dr. Sai Bharadwaj A. V. S. L.**, MS Ramaiah Institute of Technology (MSRIT)-Bangalore, India

**Assist. Prof. (Sl.grade) Niju Subramaniapillai**, PSG College of Technology, Coimbatore, India

### DESCRIPTION

---

Production of different value-added products and biofuels from lignocellulosic biomass will lead to a reduction in energy demand and environmental degradation caused by the continuous utilization of fossil fuel sources. Apart from many existing strategies like chemical, physical, biological, combined, etc., in the pretreatment of lignocellulosic biomass, intensification is a unique method to deliver momentous changes in today's biorefinery. For example, ultrasound-assisted treatment of lignocellulosic biomass in presence of any acid/base catalysts is one of the developing strategies in biomass pretreatment studies which aids in the enhancement of low-cost biorefinery in terms of reaction time, reaction temperature, etc. The main goal of this Special Issue is to publish both recent innovative research and review articles on the development of a novel pretreatment strategy for lignocellulosic biomass. Proposed topics for this Special Issue are listed below.

### KEY TOPICS

---

- ▶ Advancement in process intensification methods in the pretreatment of lignocellulosic biomass
- ▶ Extraction of different sugars and value-added products through process intensification of lignocellulosic biomass
- ▶ Enhancement in the production of biofuels through acid/base-catalyzed process intensification strategies
- ▶ Techno-economic studies on the development of process intensification methods in the pretreatment of lignocellulosic biomass

## HOW TO SUBMIT

---

Before submission authors should carefully read the [Instruction for Authors](#). In order to make the preparation of manuscript easier, you are advised to use the [Manuscript Template](#).

All submissions to the Special Issue must be made electronically via the [ScholarOne submission system](#).

All manuscripts will undergo the standard peer-review process (single-blind, at least two independent reviewers). When entering your submission via online submission system please choose **“Special Issue: Biomass pretreatment”**.

Submission of a manuscript implies that the work described has not been published before and it is not under consideration for publication anywhere else.

The deadline for submissions has been extended to **September 30th, 2023**, but individual papers will be reviewed and published online on an ongoing basis.

Contributors to the Special Issue will benefit from:

- ▶ **indexation in Web of Science, SCOPUS, SCImago (SJR), and many other services**
- ▶ quick and constructive peer review provided by experts in the field
- ▶ no space constraints
- ▶ convenient, web-based paper submission and tracking system – ScholarOne
- ▶ quick online publication upon completing the publishing process (**continuous publication model**)
- ▶ better visibility due to **Open Access**
- ▶ **long-term preservation** of the content (articles archived in Portico)
- ▶ extensive post-publication promotion for selected papers

We are looking forward to your submission!

In case of any questions please contact the Managing Editor of Green Processing and Synthesis (Dr. Krzysztof Dębniak, [gps.editorial@degruyter.com](mailto:gps.editorial@degruyter.com)).
